# Supplementary material
Source: publisher figshare collection journal article supplement (https://gsajournals.figshare.com/ndownloader/files/12778427)
Supplement: Supplementary file 1 [file 12778427]

| **Program and version used in OL2** | ***C. elegans* source data** | **Human source data** |
| --- | --- | --- |
| **Ensembl Compara v87-89** | v87: WormBase 235  v88: WormBase 235  v89: WormBase 235 | v87: GRCh38.p7  v88: GRCh38.p10  v89: GRCh38.p10 |
| **HomoloGene v68** | WormBase 195 | GRCh38 |
| **InParanoid v8** | UniProt (version not specified) | UniProt (version not specified) |
| **OrthoMCL v5** | WormBase 206 | GRCh37.56 |
| **OMA v1** | WormBase 235 | Ensembl v80 |
| **OrthoInspector v2** | UniProt (version not specified) | Ensembl v64 |

GRCh data are annotated genome assemblies from the NCBI Genome Reference Consortium (<https://www.ncbi.nlm.nih.gov/grc/human)>. Ensembl further annotates this data and makes it available to the research community (for details of annotations, see notes for Ensembl v89 here: <http://may2017.archive.ensembl.org/Homo_sapiens/Info/Annotation)>. UniProt is a comprehensive resource for protein sequence and annotation data. More information can be found at: <https://www.uniprot.org/help/about>.
